# Supplementary material
Source: PubMed Central journal article supplement (PMC6364566)
Supplement: NIHMS1500331-supplement-2.pdf [file NIHMS1500331-supplement-2.pdf]

## Reporting Summary

Nature Research wishes to improve the reproducibility of the work that we publish. This form provides structure for consistency and transparency in reporting. For further information on Nature Research policies, see [Authors & Referees](#) and the [Editorial Policy Checklist](#).

### Statistical parameters

When statistical analyses are reported, confirm that the following items are present in the relevant location (e.g. figure legend, table legend, main text, or Methods section).

n/a Confirmed

- The exact sample size ( $n$ ) for each experimental group/condition, given as a discrete number and unit of measurement
- An indication of whether measurements were taken from distinct samples or whether the same sample was measured repeatedly
- The statistical test(s) used AND whether they are one- or two-sided  
*Only common tests should be described solely by name; describe more complex techniques in the Methods section.*
- A description of all covariates tested
- A description of any assumptions or corrections, such as tests of normality and adjustment for multiple comparisons
- A full description of the statistics including central tendency (e.g. means) or other basic estimates (e.g. regression coefficient) AND variation (e.g. standard deviation) or associated estimates of uncertainty (e.g. confidence intervals)
- For null hypothesis testing, the test statistic (e.g.  $F$ ,  $t$ ,  $r$ ) with confidence intervals, effect sizes, degrees of freedom and  $P$  value noted  
*Give  $P$  values as exact values whenever suitable.*
- For Bayesian analysis, information on the choice of priors and Markov chain Monte Carlo settings
- For hierarchical and complex designs, identification of the appropriate level for tests and full reporting of outcomes
- Estimates of effect sizes (e.g. Cohen's  $d$ , Pearson's  $r$ ), indicating how they were calculated
- Clearly defined error bars  
*State explicitly what error bars represent (e.g. SD, SE, CI)*

*Our web collection on [statistics for biologists](#) may be useful.*

### Software and code

Policy information about [availability of computer code](#)

Data collection

Sequencing data collection used Illumina pipelines for image processing and base calling.

Data analysis

Alignment of SSDS fragments to the genome and parsing of ss/dsDNA used the SSDS pipeline (Khil et al.; Genome Research 2012). Source code is available at <https://github.com/kevbrick/SSDSpipeline>. DSB hotspots were called and their strength calculated using the SSDS peak calling pipeline (Khil et al.; Genome Research 2012). Source code is available at <https://github.com/kevbrick/callHotspotsSSDS>. Algorithms used for ChIP-Seq analyses are specified below.

For manuscripts utilizing custom algorithms or software that are central to the research but not yet described in published literature, software must be made available to editors/reviewers upon request. We strongly encourage code deposition in a community repository (e.g. GitHub). See the Nature Research [guidelines for submitting code & software](#) for further information.

## Data

Policy information about [availability of data](#)

All manuscripts must include a [data availability statement](#). This statement should provide the following information, where applicable:

- Accession codes, unique identifiers, or web links for publicly available datasets
- A list of figures that have associated raw data
- A description of any restrictions on data availability

The sequencing data reported in this paper are archived at the Gene Expression Omnibus ([www.ncbi.nlm.nih.gov/geo](http://www.ncbi.nlm.nih.gov/geo)) as accession no. GSE99921. A table of processed data is provided as a supplementary data file. This contains the data required to re-plot most figures. Data will be released upon publication with no restrictions.

## Field-specific reporting

Please select the best fit for your research. If you are not sure, read the appropriate sections before making your selection.

Life sciences       Behavioural & social sciences       Ecological, evolutionary & environmental sciences

For a reference copy of the document with all sections, see [nature.com/authors/policies/ReportingSummary-flat.pdf](http://nature.com/authors/policies/ReportingSummary-flat.pdf)

## Life sciences study design

All studies must disclose on these points even when the disclosure is negative.

|                 |                                                                                                                                                                                                                                   |
|-----------------|-----------------------------------------------------------------------------------------------------------------------------------------------------------------------------------------------------------------------------------|
| Sample size     | No statistical methods were used to predetermine sample size. 9 individual male DSB maps were generated to estimate inter-individual variability and technical noise in SSDS. Two female DSB maps were generated as replicates.   |
| Data exclusions | No data were excluded from analyses.                                                                                                                                                                                              |
| Replication     | The detailed protocols we use for DSB mapping and H3K4me3 ChIP-Seq have been used successfully by multiple research groups for DSB mapping in male mice. Applying these methods to female meiosis should be equally reproducible. |
| Randomization   | Randomization was not employed in this study.                                                                                                                                                                                     |
| Blinding        | Blinding was not employed in this study.                                                                                                                                                                                          |

## Reporting for specific materials, systems and methods

### Materials & experimental systems

| n/a                                 | Involved in the study                                           |
|-------------------------------------|-----------------------------------------------------------------|
| <input checked="" type="checkbox"/> | <input type="checkbox"/> Unique biological materials            |
| <input type="checkbox"/>            | <input checked="" type="checkbox"/> Antibodies                  |
| <input checked="" type="checkbox"/> | <input type="checkbox"/> Eukaryotic cell lines                  |
| <input checked="" type="checkbox"/> | <input type="checkbox"/> Palaeontology                          |
| <input type="checkbox"/>            | <input checked="" type="checkbox"/> Animals and other organisms |
| <input checked="" type="checkbox"/> | <input type="checkbox"/> Human research participants            |

### Methods

| n/a                                 | Involved in the study                              |
|-------------------------------------|----------------------------------------------------|
| <input type="checkbox"/>            | <input checked="" type="checkbox"/> ChIP-seq       |
| <input type="checkbox"/>            | <input checked="" type="checkbox"/> Flow cytometry |
| <input checked="" type="checkbox"/> | <input type="checkbox"/> MRI-based neuroimaging    |

## Antibodies

|                 |                                                                                                                                                                                                                                                                                                                                                                                                                                                                                                             |
|-----------------|-------------------------------------------------------------------------------------------------------------------------------------------------------------------------------------------------------------------------------------------------------------------------------------------------------------------------------------------------------------------------------------------------------------------------------------------------------------------------------------------------------------|
| Antibodies used | anti-DMC1 (Santa Cruz: c-20; sc-8973)<br>anti-DMC1 (custom; polyclonal rabbit antibody to His-tagged full length human DMC1)<br>anti-H3K4me3 (Millipore: #07-473)<br>anti-H3K4me3 (Abcam 8580)                                                                                                                                                                                                                                                                                                              |
| Validation      | The c-20 anti-DMC1 antibody has been extensively validated in mice using both ChIP-Seq and immunofluorescence microscopy (Smagulova et al, Nature 2011). The custom anti-DMC1(human) polyclonal antibody was validated in mouse using ChIP-Seq in a male mouse. The hotspot signal correlated very well with SSDS using the established c-20 anti-DMC1 antibody (see manuscript).<br><br>Both anti-H3K4me3 antibodies have been raised against peptides from human H3K4me3 that share extreme homology with |

mouse H3K4me3. These have been extensively validated by the manufacturers ([http://www.emdmillipore.com/US/en/product/Anti-trimethyl-Histone-H3-Lys4-Antibody,MM\\_NF-07-473#](http://www.emdmillipore.com/US/en/product/Anti-trimethyl-Histone-H3-Lys4-Antibody,MM_NF-07-473#); <http://www.abcam.com/histone-h3-tri-methyl-k4-antibody-chip-grade-ab8580.html>). Independent studies show that both antibodies recognize H3K4me3 from very distant species (fly, worm; <http://compbio.med.harvard.edu/antibodies/targets/29>). Furthermore, both antibodies yield a ChIP-Seq signal at meiosis-specific H3K4me3 sites specified by the binding of the PRDM9 protein.

## Animals and other organisms

Policy information about [studies involving animals](#); [ARRIVE guidelines](#) recommended for reporting animal research

Laboratory animals

Both male and female wild-type adult mice were from C57Bl6/J background.  
Dnmt3L<sup>-/-</sup> adult mice (B6.129S6-Dnmt3Ltm1Bes/J) were obtained from Jackson labs.  
Prdm9<sup>-/-</sup> adult mice (B6;129P2-Prdm9 tm1Ymat/J) were obtained from Jackson labs.

Wild animals

N/A

Field-collected samples

N/A

## ChIP-seq

### Data deposition

Confirm that both raw and final processed data have been deposited in a public database such as [GEO](#).

Confirm that you have deposited or provided access to graph files (e.g. BED files) for the called peaks.

Data access links

*May remain private before publication.*

<https://www.ncbi.nlm.nih.gov/geo/query/acc.cgi?acc=GSE99921>  
Reviewer access token: wzgiyqaolzszfwv

Files in database submission

B6wt\_30dpp\_H3K4me3.fastq.gz  
B6wt\_30dpp\_H3K4me3.peaks.bed  
Dnmt3Lko\_30dpp\_H3K4me3.fastq.gz  
Dnmt3Lko\_30dpp\_H3K4me3.peaks.bed  
Dnmt3Lko\_30dpp\_input.fastq.gz  
Ovary\_H3K4me3.R1.fastq.gz  
Ovary\_H3K4me3.R2.fastq.gz  
Ovary\_H3K4me3.peaks.bedgraph.gz  
Ovary\_SSDS\_O1.DSBhotspots.bedgraph  
Ovary\_SSDS\_O1.R1.fastq.gz  
Ovary\_SSDS\_O1.R2.fastq.gz  
Ovary\_SSDS\_O1.ssDNA\_type1.bam  
Ovary\_SSDS\_O1.ssDNA\_type1.bam.bai  
Ovary\_SSDS\_O1.ssDNA\_type1.bed  
Ovary\_SSDS\_O2.DSBhotspots.bedgraph  
Ovary\_SSDS\_O2.R1.fastq.gz  
Ovary\_SSDS\_O2.R2.fastq.gz  
Ovary\_SSDS\_O2.ssDNA\_type1.bam  
Ovary\_SSDS\_O2.ssDNA\_type1.bam.bai  
Ovary\_SSDS\_O2.ssDNA\_type1.bed  
Ovary\_input\_SSDS\_O1.R1.fastq.gz  
Ovary\_input\_SSDS\_O1.R2.fastq.gz  
Testis\_DMC1\_200k\_N1.fastq.gz  
Testis\_SSDS\_DN1.DSBhotspots.bedgraph  
Testis\_SSDS\_DN1.R1.fastq.gz  
Testis\_SSDS\_DN1.R2.fastq.gz  
Testis\_SSDS\_DN1.ssDNA\_type1.bam  
Testis\_SSDS\_DN1.ssDNA\_type1.bam.bai  
Testis\_SSDS\_DN1.ssDNA\_type1.bed  
Testis\_SSDS\_Prmd9ko.DSBhotspots.bedgraph  
Testis\_SSDS\_Prmd9ko.R1.fastq.gz  
Testis\_SSDS\_Prmd9ko.R2.fastq.gz  
Testis\_SSDS\_Prmd9ko.mm10.ssDNA\_type1.bam  
Testis\_SSDS\_Prmd9ko.mm10.ssDNA\_type1.bam.bai  
Testis\_SSDS\_Prmd9ko.mm10.ssDNA\_type1.bed  
Testis\_SSDS\_Hop2ko.R1.fastq.gz  
Testis\_SSDS\_Hop2ko.R2.fastq.gz  
Testis\_SSDS\_Hop2ko.mm10.ssDNA\_type1.bam  
Testis\_SSDS\_Hop2ko.mm10.ssDNA\_type1.bam.bai  
Testis\_SSDS\_Hop2ko.mm10.ssDNA\_type1.bed  
Testis\_SSDS\_T1.DSBhotspots.bedgraph  
Testis\_SSDS\_T1.R1.fastq.gz  
Testis\_SSDS\_T1.R2.fastq.gz  
Testis\_SSDS\_T1.ssDNA\_type1.bam

Testis\_SSDS\_T1.ssDNA\_type1.bam.bai  
 Testis\_SSDS\_T1.ssDNA\_type1.bed  
 Testis\_SSDS\_T2.DSBhotspots.bedgraph  
 Testis\_SSDS\_T2.R1.fastq.gz  
 Testis\_SSDS\_T2.R2.fastq.gz  
 Testis\_SSDS\_T2.ssDNA\_type1.bam  
 Testis\_SSDS\_T2.ssDNA\_type1.bam.bai  
 Testis\_SSDS\_T2.ssDNA\_type1.bed  
 Testis\_SSDS\_T3.DSBhotspots.bedgraph  
 Testis\_SSDS\_T3.R1.fastq.gz  
 Testis\_SSDS\_T3.R2.fastq.gz  
 Testis\_SSDS\_T3.ssDNA\_type1.bam  
 Testis\_SSDS\_T3.ssDNA\_type1.bam.bai  
 Testis\_SSDS\_T3.ssDNA\_type1.bed  
 Testis\_SSDS\_T4.DSBhotspots.bedgraph  
 Testis\_SSDS\_T4.R1.fastq.gz  
 Testis\_SSDS\_T4.R2.fastq.gz  
 Testis\_SSDS\_T4.ssDNA\_type1.bam  
 Testis\_SSDS\_T4.ssDNA\_type1.bam.bai  
 Testis\_SSDS\_T4.ssDNA\_type1.bed  
 Testis\_SSDS\_T5.DSBhotspots.bedgraph  
 Testis\_SSDS\_T5.R1.fastq.gz  
 Testis\_SSDS\_T5.R2.fastq.gz  
 Testis\_SSDS\_T5.ssDNA\_type1.bam  
 Testis\_SSDS\_T5.ssDNA\_type1.bam.bai  
 Testis\_SSDS\_T5.ssDNA\_type1.bed  
 Testis\_SSDS\_T6.DSBhotspots.bedgraph  
 Testis\_SSDS\_T6.R1.fastq.gz  
 Testis\_SSDS\_T6.R2.fastq.gz  
 Testis\_SSDS\_T6.ssDNA\_type1.bam  
 Testis\_SSDS\_T6.ssDNA\_type1.bam.bai  
 Testis\_SSDS\_T6.ssDNA\_type1.bed  
 Testis\_SSDS\_T7.DSBhotspots.bedgraph  
 Testis\_SSDS\_T7.R1.fastq.gz  
 Testis\_SSDS\_T7.R2.fastq.gz  
 Testis\_SSDS\_T7.ssDNA\_type1.bam  
 Testis\_SSDS\_T7.ssDNA\_type1.bam.bai  
 Testis\_SSDS\_T7.ssDNA\_type1.bed  
 Testis\_SSDS\_T8.DSBhotspots.bedgraph  
 Testis\_SSDS\_T8.R1.fastq.gz  
 Testis\_SSDS\_T8.R2.fastq.gz  
 Testis\_SSDS\_T8.ssDNA\_type1.bam  
 Testis\_SSDS\_T8.ssDNA\_type1.bam.bai  
 Testis\_SSDS\_T8.ssDNA\_type1.bed  
 Testis\_SSDS\_T9.DSBhotspots.bedgraph  
 Testis\_SSDS\_T9.R1.fastq.gz  
 Testis\_SSDS\_T9.R2.fastq.gz  
 Testis\_SSDS\_T9.ssDNA\_type1.bam  
 Testis\_SSDS\_T9.ssDNA\_type1.bam.bai  
 Testis\_SSDS\_T9.ssDNA\_type1.bed  
 Testis\_input\_SSDS.R1.fastq.gz  
 Testis\_input\_SSDS.R2.fastq.gz  
 Testis\_input\_SSDS.ssDNA\_type1.bam  
 Testis\_input\_SSDS.ssDNA\_type1.bam.bai  
 Testis\_input\_SSDS.ssDNA\_type1.bed  
 Testis\_H3K4me3\_BSSeq.run1.mm10.R1.fastq.gz  
 Testis\_H3K4me3\_BSSeq.run1.mm10.R2.fastq.gz  
 Testis\_H3K4me3\_BSSeq.run2.mm10.R1.fastq.gz  
 Testis\_H3K4me3\_BSSeq.run2.mm10.R2.fastq.gz  
 Testis\_H3K4me3\_BSSeq.bismarkMethylationCalls.bedgraph.gz

Genome browser session  
(e.g. [UCSC](#))

Not provided

## Methodology

Replicates

Male DSB maps: 9 replicates from individual males; Maximum reciprocal overlap between hotspots > 90%  
 Female DSB maps: 2 replicates from pools of 230 and 90 ovaries; Maximum reciprocal overlap between hotspots = 94%  
 H3K4me3 experiments; no replicates.

Sequencing depth

Sample Total\_reads\* Aligned\_reads\*\* Unique\_aligned\_reads\*\*\* Single/Paired-End  
 Dnmt3lko\_30dpp\_input 33,036,289 29,394,228 26,801,138 Single-end  
 B6wt\_30dpp\_H3K4me3 147,013,281 135,945,673 101,088,245 Single-end  
 Ovary\_H3K4me3 40,910,457 21,695,834 21,481,579 Paired-end  
 Dnmt3lko\_30dpp\_H3K4me3 39,073,925 36,312,967 32,034,689 Single-end

Ovary\_SSDS\_O1 132,726,861 38,270,223 6,912,500 Paired-end(SSDS)  
 Ovary\_SSDS\_O2 184,101,322 66,594,381 14,562,130 Paired-end(SSDS)  
 Testis\_SSDS\_T1 173,499,622 41,448,730 19,858,588 Paired-end(SSDS)  
 Testis\_SSDS\_T2 133,369,383 40,035,209 16,197,173 Paired-end(SSDS)  
 Testis\_SSDS\_T3 103,583,213 40,287,172 14,690,253 Paired-end(SSDS)  
 Testis\_SSDS\_T4 121,949,056 33,525,473 8,505,069 Paired-end(SSDS)  
 Testis\_SSDS\_T5 65,228,101 25,756,338 7,871,727 Paired-end(SSDS)  
 Testis\_SSDS\_T6 83,861,621 45,871,302 24,957,563 Paired-end(SSDS)  
 Testis\_SSDS\_T7 111,171,893 49,394,237 21,290,033 Paired-end(SSDS)  
 Testis\_SSDS\_T8 183,443,278 32,640,277 11,999,412 Paired-end(SSDS)  
 Testis\_SSDS\_T9 26,452,649 7,936,293 6,161,585 Paired-end(SSDS)  
 Testis\_SSDS\_DN1 39,592,819 12,440,774 7,986,799 Paired-end(SSDS)  
 Testis\_SSDS\_Prdm9ko 253,731,930 67,111,851 49,802,403 Paired-end(SSDS)  
 Testis\_SSDS\_Hop2ko 71,946,748 2,464,767 2,092,085 Paired-end(SSDS)  
 Testis\_input\_SSDS 1,045,039,445 95,673,845 61,744,518 Paired-end(SSDS)  
 Ovary\_input\_SSDS\_O1 122,141,174 49,622,950 34,083,176 Paired-end(SSDS)  
 Testis\_DMC1\_200k\_N1 60,071,689 4,397,658 900,574 Single-end  
 Testis\_DMC1\_200k\_N1 60,071,689 4,397,658 900,574 Single-end  
 Testis\_H3K4me3\_BSSeq 149,850,372 98,065,992 98,065,992 Paired-end

\* For Paired-End samples, only the number of first end reads are shown

\*\* For SSDS samples, the aligned reads are given as the number of aligned ssDNA-type1 fragments.

For other samples, this shows the number of aligned reads. For paired-end samples, it is the number of aligned first-end reads.

\*\*\* For SSDS samples, this shows the number of unique type-1 ssDNA fragments (determined from position and ITR structure; see Khil et al. Genome Res. 2012). For the H3K4me3\_BSSeq sample, the total and uniquely aligning read counts are equal because the reads are deduplicated during the bismark alignment pipeline. For other samples, duplicates flagged by picard are removed.

#### Antibodies

anti-DMC1 (Santa Cruz: c-20; sc-8973)

anti-DMC1 (custom; polyclonal rabbit antibody to His-tagged full length human DMC1)

anti-H3K4me3 (Millipore: #07-473)

anti-H3K4me3 (Abcam 8580)

#### Peak calling parameters

For SSDS:

Uniquely mapping fragments unambiguously derived from ssDNA (ssDNA type 1) and having both reads with a mapping quality score  $\geq 30$  were used for identifying hotspot locations (peak calling). NCIS was used to estimate the background fraction for each library. Peak calling was performed using MACS (v.2.1.0.20150420) with the following parameters :

```
--ratio [output from NCIS]
-g mm
--bw 1000
--keep-dup all
--slocal 5000
```

For H3K4me3:

Uniquely mapping reads with a mapping quality score  $\geq 30$  were used for peak calling. NCIS was used to estimate the background fraction relative to an input DNA library. Peak calling was performed using MACS (v.2.1.0.20150420) with the following parameters :

```
--ratio [output from NCIS]
-g mm
--bw 1000
--keep-dup all
--slocal 5000.
```

Peak strength was subsequently calculated by subtracting the NCIS normalized input read count from the ChIP-Seq read count.

#### Data quality

For SSDS, we use a mixture-model-based approach that accounts for GC-biases to calculate a corrected p-value for each hotspot (model = negative binomial; num. iterations for refinement = 100) (Teng & Irizarry; Genome Research 2017). P-values were adjusted for multiple testing using the Benjamini-Hochberg method. Hotspots with a GC-corrected P-value  $> 0.05$  and DSB hotspots within regions previously blacklisted (Smagulova, Brick et al.; Genes & Dev 2016) were discarded.

#### Software

Alignment of SSDS fragments to the genome and parsing of ss/dsDNA used the SSDS pipeline (Khil et al.; Genome Research 2012). Source code is available at <https://github.com/kevbrick/SSDSPipeline>. DSB hotspots were called and their strength calculated using the SSDS peak calling pipeline (Khil et al.; Genome Research 2012). Source code is available at <https://github.com/kevbrick/callHotspotsSSDS>. MANorm was used to determine DSB hotspots with differential usage between males and females.

## Plots

Confirm that:

- The axis labels state the marker and fluorochrome used (e.g. CD4-FITC).
- The axis scales are clearly visible. Include numbers along axes only for bottom left plot of group (a 'group' is an analysis of identical markers).
- All plots are contour plots with outliers or pseudocolor plots.
- A numerical value for number of cells or percentage (with statistics) is provided.

## Methodology

Sample preparation

Fetal gonads were dissected from 15.5 dpc C57Bl/6J mice. Nuclei were prepared using the BITS-ChIP protocol (Bonn, Zinzen et al; Nature Genetics, 2012) and an antibody against a component of the meiotic synaptonemal complex, SCP3 (Santa Cruz: sc-74569).

Instrument

BD FACSAria Fusion

Software

BD FACS Diva 8.0.1, FlowCore package (R)

Cell population abundance

>90% of the post-sort fraction was validated as SCP3 positive using immunofluorescence microscopy.

Gating strategy

We first gated to retain only single nuclei (not shown). We then gated 4C nuclei using DAPI (92,000 < DAPI signal <170,000), and using an oocyte-specific marker, SCP3 (SCP signal >10,000). We defined the SCP3 gate using an aliquot of our sample to which the primary antibody was not added (Secondary only). This estimates the background fluorescence from the secondary antibody. A figure describing the sorting is provided in supplementary information.

- Tick this box to confirm that a figure exemplifying the gating strategy is provided in the Supplementary Information.
