# Supplementary material
Source: PubMed Central journal article supplement (PMC6364566)

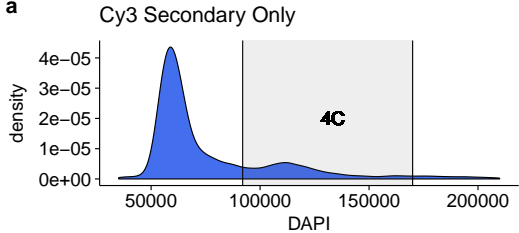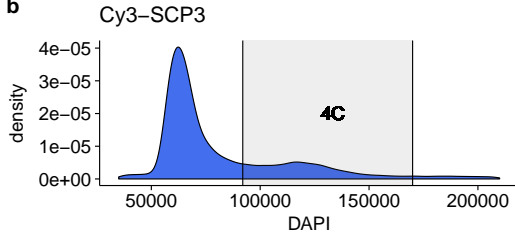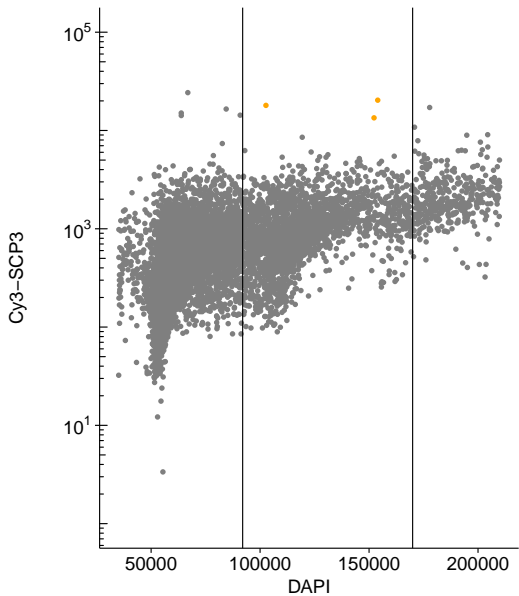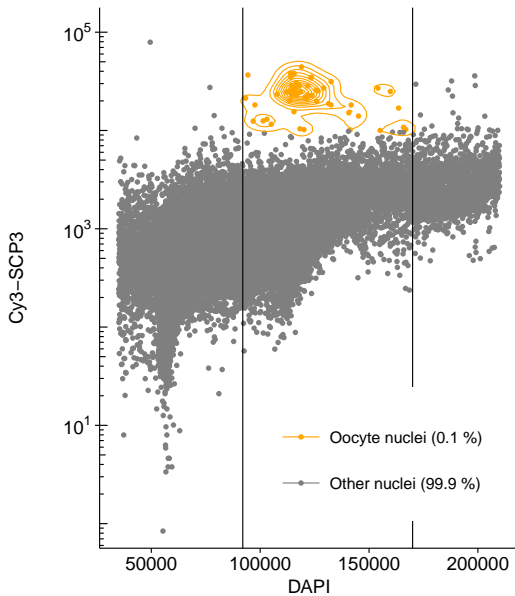

Supplement: NIHMS1500331-supplement-4.pdf [file NIHMS1500331-supplement-4.pdf]
